# Supplementary material for: Multi-wavelength fusion column fingerprint technology combined with chemometric analysis to evaluate the overall quality of the Gardenia jasminoides root
Source: Royal Society of Chemistry journal article supplement (doi:10.1039/d2ay00358a), 2022-01-01
Supplement: d2ay00358a1.pdf [file d2ay00358a1.pdf]

1

2 **Multi-wavelength Fusion Column Fingerprint Technology**  
3 **Combined with Chemometrics Analysis to Evaluate the**  
4 **Overall Quality of *Gardenia Jasminoides* Root**

5

6 Hui Zhang<sup>1\*</sup>, Rui Bai<sup>1</sup>, Yameng Wu<sup>1</sup>, Jielin Zeng<sup>1</sup>, Huijie Jiang<sup>1</sup>, Xiaoyi Liu<sup>1</sup>,

7

Hongxu Zhang<sup>1</sup>, Jizhong Yan<sup>1\*</sup>

8

9

10 **Affiliations:**

11 <sup>1</sup> College of Pharmaceutical Science, Zhejiang University of Technology, No. 18,

12 Chaowang Road, Hangzhou 310014, China

13

14 **\*Corresponding author:** Associate professor Hui Zhang, Professor Jizhong Yan,

15 College of Pharmaceutical Science, Zhejiang University of Technology, Hangzhou

16 310014, China.

17 E-mail address: [zh889@zjut.edu.cn](mailto:zh889@zjut.edu.cn) (Hui Zhang) or [yjz@zjut.edu.cn](mailto:yjz@zjut.edu.cn) (Jizhong Yan).

18 Tel.: 0571-88320984; Fax: 0571-88320984.

19

20

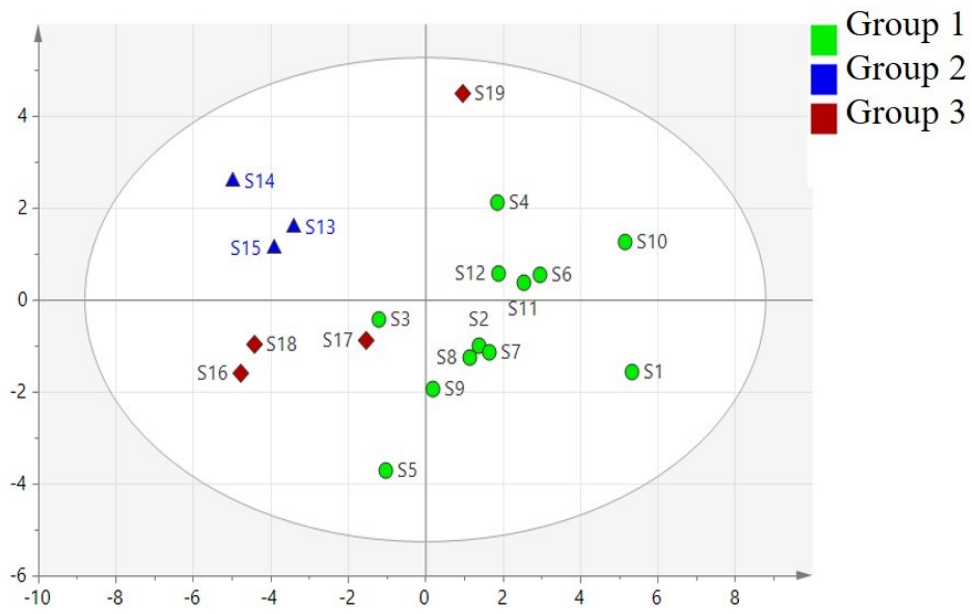

Figure S1 The score scatter plot of PCA

Table S1 Sample information of *Gardenia Jasminoides* root

| No. | Batches      | Geographical regions  | No. | Batches      | Geographical regions  |
|-----|--------------|-----------------------|-----|--------------|-----------------------|
| S1  | ZZG-R2006001 | Yunhe,<br>Zhejiang    | S11 | ZZG-R2006011 | Lishui, Zhejiang      |
| S2  | ZZG-R2006002 | Jingning,<br>Zhejiang | S12 | ZZG-R2006012 | Zhejiang              |
| S3  | ZZG-R2006003 | Qingtian,<br>Zhejiang | S13 | ZZG-R2006013 | Jiujiang, Jiangxi     |
| S4  | ZZG-R2006004 | Longquan,<br>Zhejiang | S14 | ZZG-R2006014 | Jiujiang, Jiangxi     |
| S5  | ZZG-R2006005 | Qingtian,<br>Zhejiang | S15 | ZZG-R2006015 | Jiujiang, Jiangxi     |
| S6  | ZZG-R2006006 | Lishui,<br>Zhejiang   | S16 | ZZG-R2006016 | Meizhou,<br>Guangdong |
| S7  | ZZG-R2006007 | Lishui,<br>Zhejiang   | S17 | ZZG-R2006017 | Meizhou,<br>Guangdong |
| S8  | ZZG-R2006008 | Yunhe,<br>Zhejiang    | S18 | ZZG-R2006018 | Sanming, Fujian       |
| S9  | ZZG-R2006009 | Lishui,<br>Zhejiang   | S19 | ZZG-R2006019 | Sanming, Fujian       |
| S10 | ZZG-R2006010 | Lishui,<br>Zhejiang   |     |              |                       |

Table S2 Retention time and peak area after fusion of five wavelengths

| RT <sup>a</sup> (min ) | PA <sup>b</sup> (mAU*S ) | RT <sup>a</sup> (min ) | PA <sup>b</sup> (mAU*S ) | RT <sup>a</sup> (min ) | PA <sup>b</sup> (mAU*S ) |
|------------------------|--------------------------|------------------------|--------------------------|------------------------|--------------------------|
| 2.6                    | 5065.786                 | 19.4                   | 434.138                  | 34.4                   | 2418.753                 |
| 2.7                    | 4529.185                 | 20.3                   | 746.656                  | 35.0                   | 251.268                  |
| 3.5                    | 1577.235                 | 20.7                   | 482.059                  | 35.7                   | 655.175                  |
| 4.2                    | 202.359                  | 21.6                   | 718.015                  | 37.6                   | 516.384                  |
| 4.4                    | 276.508                  | 22.9                   | 356.325                  | 37.7                   | 333.157                  |
| 7.5                    | 283.112                  | 23.3                   | 528.056                  | 38.4                   | 483.566                  |
| 7.7                    | 200.337                  | 23.4                   | 1457.838                 | 39.3                   | 529.064                  |
| 8.1                    | 1423.481                 | 24.1                   | 2229.098                 | 39.5                   | 2717.124                 |
| 8.5                    | 1523.724                 | 24.8                   | 8520.913                 | 40.7                   | 442.318                  |
| 8.8                    | 797.882                  | 25.1                   | 4648.798                 | 41.4                   | 497.370                  |
| 8.9                    | 280.298                  | 25.5                   | 210.424                  | 44.0                   | 6634.245                 |
| 9.4                    | 8353.077                 | 25.6                   | 1311.051                 | 44.5                   | 1198.468                 |
| 9.9                    | 298.438                  | 26.2                   | 279.244                  | 45.0                   | 713.240                  |
| 10.4                   | 328.499                  | 26.5                   | 575.123                  | 45.3                   | 703.487                  |
| 10.6                   | 764.574                  | 26.9                   | 1077.011                 | 46.3                   | 347.775                  |
| 11.2                   | 376.550                  | 27.4                   | 1014.444                 | 47.0                   | 632.397                  |
| 15.0                   | 3455.550                 | 27.9                   | 580.886                  | 47.5                   | 276.661                  |
| 15.7                   | 7038.119                 | 28.3                   | 233.723                  | 49.8                   | 6147.807                 |
| 16.3                   | 1120.920                 | 29.1                   | 533.238                  | 50.2                   | 415.099                  |
| 17.2                   | 390.977                  | 29.4                   | 3060.414                 | 50.8                   | 7116.809                 |
| 17.9                   | 261.784                  | 30.3                   | 715.584                  | 54.9                   | 1299.407                 |
| 18.6                   | 408.474                  | 31.9                   | 1214.007                 | 67.9                   | 1516.083                 |
| 18.9                   | 1054.432                 | 32.3                   | 423.472                  | 78.2                   | 1783.453                 |
| 19.1                   | 292.556                  | 33.2                   | 913.507                  |                        |                          |

<sup>a</sup> RT: retention time

<sup>b</sup> PA: peak areas

Table S3 Common peak areas of 19 batches in 203 nm HPLC fingerprints

| No. | 1      | 2      | 3      | 4       | 5      | 6      | 7      | 8      |
|-----|--------|--------|--------|---------|--------|--------|--------|--------|
| S1  | 1577.2 | 3187.9 | 7038.1 | 8520.9  | 2613.8 | 6634.2 | 6077.1 | 7116.8 |
| S2  | 923.2  | 1775.0 | 5500.1 | 10570.2 | 1853.6 | 5073.8 | 5244.4 | 5293.6 |
| S3  | 534.2  | 1282.0 | 3988.4 | 6830.8  | 1190.2 | 3576.0 | 3604.5 | 3617.4 |
| S4  | 948.1  | 1940.6 | 5817.4 | 7657.4  | 2076.7 | 5650.4 | 5810.0 | 5118.2 |
| S5  | 947.4  | 1854.2 | 6580.4 | 8430.9  | 2269.6 | 7104.9 | 6368.2 | 6737.0 |
| S6  | 918.5  | 1580.7 | 5973.4 | 7455.6  | 1850.6 | 5391.4 | 5662.0 | 5447.4 |
| S7  | 994.0  | 1717.0 | 5742.7 | 7113.1  | 1700.7 | 5569.4 | 5418.8 | 5002.1 |
| S8  | 825.8  | 1487.6 | 5813.9 | 7186.9  | 1978.8 | 5682.5 | 5430.8 | 5659.7 |
| S9  | 868.0  | 1735.9 | 5400.3 | 9700.8  | 1974.9 | 5117.5 | 5076.1 | 4716.8 |
| S10 | 1104.9 | 1535.0 | 6814.2 | 8554.8  | 2047.6 | 6221.0 | 5733.8 | 6624.3 |
| S11 | 990.8  | 2116.1 | 5564.7 | 10317.9 | 1816.1 | 5332.4 | 5098.5 | 5282.1 |
| S12 | 935.1  | 1845.2 | 5826.2 | 9703.1  | 1795.0 | 5498.2 | 5312.6 | 5077.3 |
| S13 | 756.8  | 3862.2 | 3029.8 | 5389.8  | 490.3  | 3386.2 | 2548.9 | 2296.5 |
| S14 | 742.9  | 3374.7 | 2992.8 | 4786.3  | 431.6  | 2762.0 | 2196.2 | 2176.0 |
| S15 | 407.6  | 4517.0 | 3529.1 | 4412.8  | 728.3  | 2955.1 | 2148.6 | 2218.8 |
| S16 | 372.8  | 2497.3 | 4496.7 | 7298.0  | 1254.9 | 3116.8 | 1600.9 | 1765.1 |
| S17 | 319.5  | 1707.6 | 3257.1 | 7629.5  | 1783.0 | 6499.7 | 4948.3 | 5459.8 |
| S18 | 349.1  | 1157.2 | 2894.9 | 6135.1  | 1059.9 | 5320.3 | 3074.5 | 2899.2 |
| S19 | 601.9  | 656.2  | 2905.9 | 8416.2  | 1265.2 | 9799.5 | 7302.1 | 5453.7 |

Table S4 Common peak areas of 19 batches in fusion HPLC fingerprints

| No. | 1      | 2      | 3      | 4      | 5      | 6     | 7      | 8      | 9      | 10      | 11     | 12     | 13     | 14     | 15    | 16     | 17    | 18     | 19     | 20     | 21     |
|-----|--------|--------|--------|--------|--------|-------|--------|--------|--------|---------|--------|--------|--------|--------|-------|--------|-------|--------|--------|--------|--------|
| S1  | 5065.8 | 4529.2 | 8353.1 | 298.4  | 328.5  | 764.6 | 3455.6 | 7038.1 | 1120.9 | 8520.9  | 1311.1 | 3060.4 | 2418.8 | 529.1  | 497.4 | 6634.2 | 632.4 | 6147.8 | 7116.8 | 1299.4 | 1516.1 |
| S2  | 2588.4 | 3078.7 | 4551.6 | 422.9  | 414.3  | 611.1 | 2081.4 | 5500.1 | 818.5  | 10570.2 | 1439.0 | 1404.8 | 970.7  | 648.6  | 550.7 | 5073.8 | 659.6 | 5272.4 | 5293.6 | 1123.4 | 1635.5 |
| S3  | 1906.9 | 2338.7 | 3569.2 | 203.6  | 361.0  | 531.8 | 1940.7 | 3988.4 | 651.6  | 6830.8  | 1106.0 | 1465.7 | 766.4  | 629.7  | 584.2 | 3576.0 | 719.4 | 3658.8 | 3617.4 | 935.8  | 621.8  |
| S4  | 2714.6 | 3105.9 | 4930.4 | 381.9  | 539.3  | 754.8 | 2252.3 | 5817.4 | 974.0  | 7657.4  | 931.5  | 1921.9 | 842.5  | 965.1  | 842.5 | 5650.4 | 979.8 | 5874.0 | 5118.2 | 1008.2 | 1660.3 |
| S5  | 2356.5 | 2122.1 | 4789.2 | 235.3  | 334.0  | 627.6 | 2890.7 | 4985.2 | 906.1  | 8213.1  | 1029.1 | 994.6  | 1242.0 | 329.6  | 300.1 | 2181.1 | 397.3 | 1291.6 | 1709.2 | 585.2  | 1677.6 |
| S6  | 2970.8 | 3069.7 | 4853.7 | 372.9  | 423.6  | 668.9 | 2284.6 | 6580.4 | 851.5  | 8430.9  | 1554.6 | 2130.1 | 1280.9 | 775.0  | 716.2 | 7104.9 | 831.7 | 6432.1 | 6737.0 | 1183.5 | 1672.7 |
| S7  | 3168.1 | 3165.1 | 4085.0 | 444.4  | 0.0    | 614.6 | 2460.8 | 5973.4 | 861.3  | 7455.6  | 873.3  | 2183.2 | 2164.3 | 616.7  | 549.3 | 5391.4 | 652.4 | 5712.7 | 5447.4 | 994.2  | 1593.5 |
| S8  | 2807.5 | 2772.3 | 4193.5 | 446.1  | 0.0    | 567.1 | 2089.7 | 5742.7 | 771.0  | 7455.6  | 873.3  | 2183.2 | 2164.3 | 616.7  | 549.3 | 5391.4 | 652.4 | 5712.7 | 5447.4 | 994.2  | 1593.5 |
| S9  | 2671.1 | 2460.5 | 4023.1 | 372.2  | 0.0    | 567.4 | 1625.2 | 5813.9 | 702.9  | 7186.9  | 1145.7 | 1333.1 | 882.3  | 460.5  | 469.8 | 5682.5 | 534.1 | 5477.9 | 5659.7 | 946.1  | 1401.7 |
| S10 | 3560.3 | 4094.9 | 5039.8 | 343.9  | 494.5  | 853.5 | 3795.0 | 7373.8 | 1183.5 | 9577.6  | 1458.3 | 3094.6 | 1862.2 | 822.9  | 807.0 | 6708.0 | 894.0 | 6185.9 | 6489.6 | 1263.3 | 1608.6 |
| S11 | 3299.9 | 3767.2 | 3972.0 | 290.8  | 395.8  | 657.8 | 2808.6 | 6814.2 | 937.5  | 8554.8  | 1564.8 | 1048.6 | 0.0    | 676.2  | 685.7 | 6221.0 | 781.1 | 5779.2 | 6624.3 | 1156.3 | 1618.9 |
| S12 | 2954.3 | 2995.4 | 4803.4 | 314.6  | 0.0    | 720.1 | 2414.3 | 5826.2 | 964.9  | 9703.1  | 1242.3 | 1414.5 | 852.6  | 786.1  | 713.1 | 5498.2 | 825.4 | 5353.4 | 5077.3 | 950.7  | 1633.1 |
| S13 | 2638.5 | 3214.0 | 3702.3 | 0.0    | 1599.8 | 706.0 | 1134.5 | 3029.8 | 662.8  | 879.2   | 739.5  | 831.8  | 0.0    | 858.6  | 614.1 | 3386.2 | 728.4 | 2586.1 | 2296.5 | 0.0    | 0.0    |
| S14 | 1142.0 | 2047.9 | 2184.1 | 549.1  | 1130.4 | 707.2 | 1170.7 | 2992.8 | 669.8  | 0.0     | 589.7  | 0.0    | 0.0    | 952.1  | 708.5 | 2762.0 | 858.5 | 0.0    | 2176.0 | 0.0    | 0.0    |
| S15 | 1786.1 | 2341.6 | 2023.2 | 1161.8 | 920.9  | 0.0   | 1613.4 | 3529.1 | 786.5  | 558.2   | 726.0  | 912.3  | 985.7  | 801.7  | 655.3 | 2955.1 | 803.9 | 2166.4 | 2218.8 | 515.3  | 0.0    |
| S16 | 0.0    | 0.0    | 1189.0 | 419.5  | 7309.5 | 627.8 | 1007.4 | 4496.7 | 776.3  | 7298.0  | 725.7  | 610.8  | 930.6  | 588.9  | 455.2 | 3116.8 | 514.7 | 0.0    | 1765.1 | 746.1  | 612.7  |
| S17 | 1626.3 | 2145.1 | 773.5  | 237.4  | 4559.6 | 640.8 | 1373.4 | 3257.1 | 782.0  | 7629.5  | 897.8  | 861.4  | 1298.6 | 602.3  | 473.6 | 6499.7 | 558.6 | 4971.6 | 5459.8 | 1114.8 | 716.4  |
| S18 | 0.0    | 1845.3 | 708.4  | 314.8  | 3584.9 | 422.4 | 1457.0 | 2894.9 | 615.9  | 6135.1  | 603.2  | 993.5  | 737.4  | 453.0  | 443.7 | 5320.3 | 604.2 | 220.4  | 2899.2 | 678.2  | 0.0    |
| S19 | 2270.2 | 3676.9 | 570.1  | 287.4  | 2526.9 | 907.5 | 1778.9 | 2905.9 | 1099.9 | 8416.2  | 1291.5 | 2612.2 | 1236.9 | 1071.8 | 857.3 | 9799.5 | 997.4 | 404.4  | 5453.7 | 1031.1 | 0.0    |

Table S5 Analysis of principal components and variance of 203nm

| Component | Initial eigenvalue |               |             | Extract sum of squares load |               |             | Rotate sum of squares load |               |             |
|-----------|--------------------|---------------|-------------|-----------------------------|---------------|-------------|----------------------------|---------------|-------------|
|           | Total              | Variance<br>e | Accumulate% | Total                       | Variance<br>% | Accumulate% | Total                      | Variance<br>% | Accumulate% |
| 1         | 5.312              | 66.401        | 66.401      | 5.312                       | 66.401        | 66.401      | 3.568                      | 44.828        | 44.828      |
| 2         | 1.456              | 18.200        | 84.601      | 1.456                       | 18.200        | 84.601      | 3.182                      | 39.773        | 84.601      |

Table S6 Main factors loading matrix of 203nm

| Peaks | Load   |        |
|-------|--------|--------|
|       | 1      | 2      |
| 1     | 0.701  | 0.611  |
| 2     | -0.561 | 0.700  |
| 3     | 0.790  | 0.523  |
| 4     | 0.800  | -0.055 |
| 5     | 0.927  | 0.168  |
| 6     | 0.762  | -0.495 |
| 7     | 0.935  | -0.208 |
| 8     | 0.964  | 0.011  |
